# Supplementary material for: The role of NLRP3 inflammasome for microglial response to peripheral inflammation
Source: PubMed Central journal article supplement — Neural Regen Res. 2020 Aug 24;16(2):294–5. doi: 10.4103/1673-5374.290889 (PMC7896234; doi:10.4103/1673-5374.290889), 2020-08-24
Supplement: NRR-16-294_Suppl1.pdf [file NRR-16-294_Suppl1.pdf]

## OPEN PEER REVIEW REPORT 1

**Name of journal:** Neural Regeneration Research

**Manuscript NO:** NRR-D-20-00166

**Title:** The role of NLRP3 inflammasome for microglial response to peripheral inflammation

**Reviewer's Name:** Honghao Wang

**Reviewer's country:** China

**Date sent for review:** 2020-3-20

### COMMENTS TO AUTHORS

In this review, the important role of NLRP3 inflammasome for microglial response to peripheral inflammation is briefly expounded via the study of a large number of literatures. This article explains when peripheral inflammation how NLRP3 inflammasomes form, activate, and function in microglial under the influence of the major proinflammatory cytokines, such as IL-1 $\alpha$  and IL-1 $\beta$ , TNF- $\alpha$  and interleukin-6. It clarifies the functional pathways of NLRP3 inflammasome. The path diagram in this article is perfect. However, there is still room for improvement. References should be accepted for those reviews in recent years. Some parts of the interpretation of the pathway are unclear.
